# Supplementary material for: Lactobacillus reuteri CCFM8631 Alleviates Hypercholesterolaemia Caused by the Paigen Atherogenic Diet by Regulating the Gut Microbiota
Source: MDPI journal article supplement (doi:10.3390/nu14061272), 2022-03-17
Supplement: s1 [file s1]

## Supplementary Materials and Methods

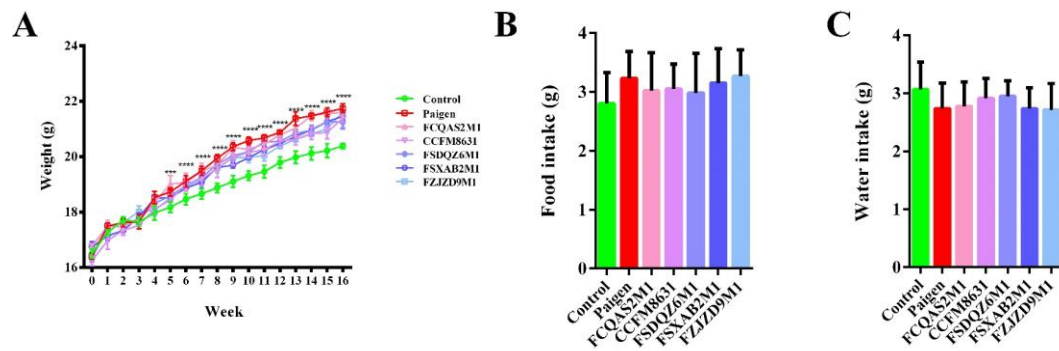

**Figure S1.** The effects of *Lactobacillus* and *Bifidobacterium* administration on body weight, food intake and water intake. (A) Effects of *Lactobacillus* and *Bifidobacterium* on body weight. Compared with Control group, \*\*\*  $p < 0.001$ , \*\*\*\*  $p < 0.0001$ . (B) Effects of *Lactobacillus* and *Bifidobacterium* on food intake. (C) Effects of *Lactobacillus* and *Bifidobacterium* on water intake. n=8.

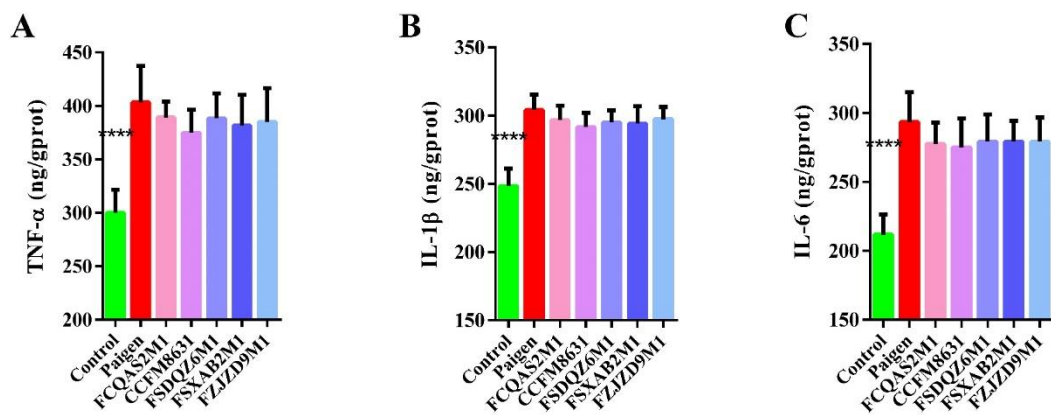

**Figure S2.** Effects of *Lactobacillus* and *Bifidobacterium* on the levels of liver pro-inflammatory cytokines. (A) Liver TNF- $\alpha$  concentrations. (B) Liver IL-1 $\beta$  concentrations. (C) Liver IL-6 concentrations. Compared with Paigen group, \*\*\*\*  $p < 0.0001$ . n=8.

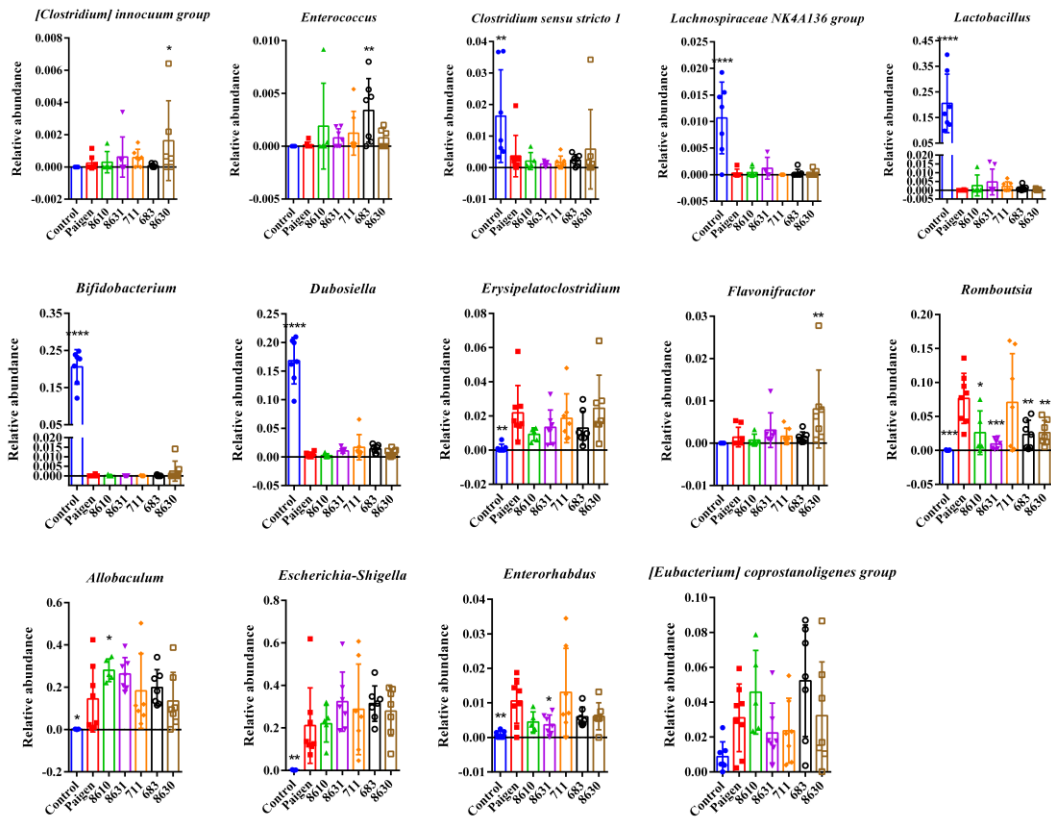

**Figure S3.** Relative abundance of the genus level. n=8. Compared with Paigen group, \*  $p < 0.05$ , \*\*  $p < 0.01$ , \*\*\*  $p < 0.001$ , \*\*\*\*  $p < 0.0001$ .

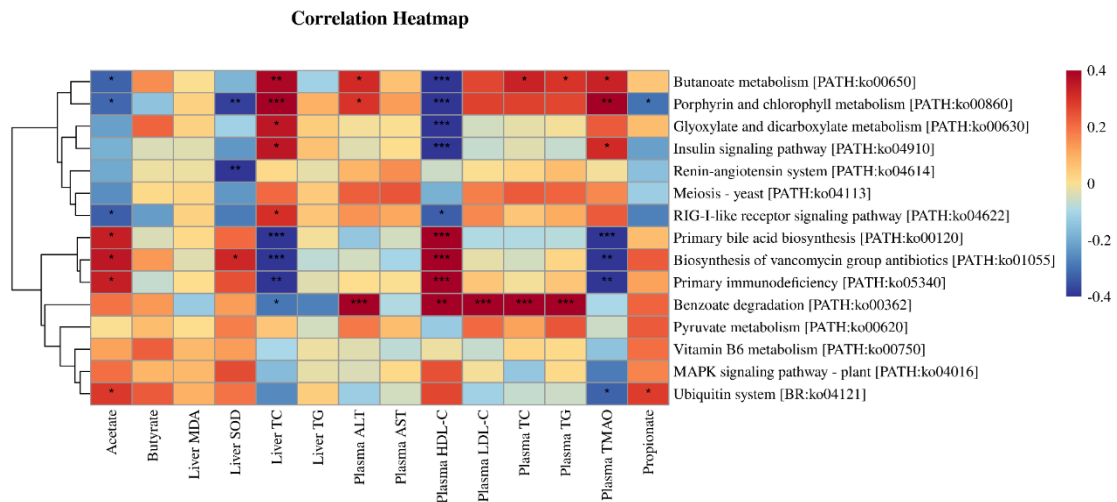

**Figure S4.** Correlation between the measured indicators and the significant pathway/function. \*  $p < 0.05$ , \*\*  $p < 0.01$ , \*\*\*  $p < 0.001$ .
